# Supplementary material for: Use of the GeneReader NGS System in a clinical pathology laboratory: a comparative study
Source: PubMed Central journal article supplement — J Clin Pathol. 2017 Apr 11;70(8):725–8. doi: 10.1136/jclinpath-2017-204342 (PMC5537555; doi:10.1136/jclinpath-2017-204342), 2017-04-11
Supplement: jclinpath-2017-204342supp001.pdf [file jclinpath-2017-204342supp001.pdf]

## Supplemental Information

# Use of the GeneReader NGS System in a Clinical Pathology

## Laboratory: a Comparative Study

Ulrike Koitzsch<sup>1,#</sup>, Carina Heydt<sup>1,#</sup>, Hans Attig<sup>2</sup>, Isabelle Immerschitt<sup>1</sup>, Sabine Merkelbach-Bruse<sup>1</sup>,  
Alessandro Fammartino<sup>2</sup>, Reinhard Büttner<sup>1,4</sup>, Yi Kong<sup>1</sup>, Margarete Odenthal<sup>1,3\*</sup>

**#: equal contribution**

<sup>1</sup>Institut of Pathology, University Hospital of Cologne, Germany

<sup>2</sup>QIAGEN GmbH, Max-Volmer-Straße 4, 40724 Hilden, Germany.

<sup>3</sup> Center of Molecular Medicine Cologne (CMMC), University of Cologne, Germany

## Supplemental Material and Methods

### In-house target enrichment and Illumina MiSeq sequencing

For multiplex PCR-based target enrichment, GeneRead DNAseq customized V2 panels from Qiagen (Hilden, Germany) were used, either targeting lung cancer relevant gene loci (lung cancer panel) or melanoma and gastrointestinal cancer relevant ones. These three panels comprise a subset of cancer-related genes including among others *KRAS*, *NRAS*, *KIT*, *BRAF*, *PDGFRA*, *ALK*, *EGFR*, *ERBB2* and *PIK3CA*. Multiplex PCR, using the GeneRead DNAseq Panel PCR Kit V2, was performed in four separate multiplex PCR reactions per sample according to the GeneRead DNAseq Gene Panel Handbook (Qiagen). After 23 cycles, amplicons of each sample were pooled and purified by means of Agencourt® AMPure® XP magnetic beads and a Biomek® FXP workstation (Beckman Coulter Inc, Fullerton, USA). Libraries were constructed using the Gene Read DNA Library I Core Kit and the Gene Read DNA I Amp Kit (Qiagen). After End-Repair and adenylation, NEXTflex DNA Barcodes were ligated (Bio Scientific, Austin, TX, USA). Following Agencourt® AMPure® XP magnetic bead purification and size selection, barcoded libraries were amplified by 9 PCR cycles. Library products were quantified with Qubit dsDNA HS Assay Kit (Thermo Fisher Scientific, Waltham, MA, USA) on the Qubit 2.0 Fluorometer (Thermo Fisher Scientific), diluted and pooled in equal amounts. Finally, 12 pM of the constructed libraries were sequenced on a MiSeq instrument (Illumina, Inc.) with a MiSeq reagent Kit V2 (300-cycles) (Illumina, Inc.) following the manufacturer's recommendations.

### In-house Data analysis

Fastq files were generated by the MiSeq Reporter Software (Illumina, Inc.) and analysed by an in-house validated bioinformatics pipeline based on our general cancer genome analysis algorithm [1] which was further optimized for the diagnostic workflow as previously described [2, 3]. All variants were listed but only non-synonymous variants with an allelic frequency above 5% and a coverage above 200x were reported directly after further evaluation by the Integrative Genome Viewer (IGV,

Broad Institute, Cambridge, MA, USA). In addition, therapy relevant activation mutations with an allele frequency below 5 % of samples with a tumor cell content of 10 – 20% were also reported.

### Sanger sequencing

In the reference samples, *KIT* mutations have been detected by Sanger sequencing according to Heydt et al. [4]. *PDGFRA* mutations were also identified by conventional Sanger sequencing as described by Kuenstlinger et al. [5, 6].

Furthermore, for validation of the NGS results, conventional Sanger sequencing was carried out. Sanger sequencing was performed using the Big Dye Terminator Technology and an ABI 3500 sequencer (Applied Biosystems). Primer sets, used for Sanger sequencing are listed in Supplemental Table 1.

### References of the Supplemental Material and Methods

1. Peifer M, Fernandez-Cuesta L, Sos ML, et al. Integrative genome analyses identify key somatic driver mutations of small-cell lung cancer. *Nat Genet* 2012; 44: 1104-1110.
2. Konig K, Peifer M, Fassunke J, et al. Implementation of Amplicon Parallel Sequencing Leads to Improvement of Diagnosis and Therapy of Lung Cancer Patients. *J Thorac Oncol* 2015; 10: 1049-57.
3. Vollbrecht C, Mairinger FD, Koitzsch U, et al. Comprehensive Analysis of Disease-Related Genes in Chronic Lymphocytic Leukemia by Multiplex PCR-Based Next Generation Sequencing. *PLoS One* 2015; 10: e0129544.
4. Heydt C, Kumm N, Fassunke J, et al. Massively parallel sequencing fails to detect minor resistant subclones in tissue samples prior to tyrosine kinase inhibitor therapy. *BMC Cancer* 2015; 15: 291.

5. Kunstlinger H, Binot E, Merkelbach-Bruse S, et al. High-resolution melting analysis is a sensitive diagnostic tool to detect imatinib-resistant and imatinib-sensitive PDGFRA exon 18 mutations in gastrointestinal stromal tumors. *Hum Pathol* 2014; 45: 573-82.
6. Ney JT, Froehner S, Roesler A, et al. High-resolution melting analysis as a sensitive prescreening diagnostic tool to detect KRAS, BRAF, PIK3CA, and AKT1 mutations in formalin-fixed, paraffin-embedded tissues. *Arch Pathol Lab Med* 2012; 136: 983-92.

## Supplementary Tables

**Supplemental Table 1: Primer sets used for Sanger sequencing**

| Primer     | Sequence                           | Annealing T° | Amplicon size |
|------------|------------------------------------|--------------|---------------|
| KIT E 8-F  | GAA GTG AAT GTT GCT GAG G          | 57°C         | 234 bp        |
| KIT E 8-R  | GTG AAT TGC AGT CCT TCC            |              |               |
| KIT E 9-F  | GCC ACA TCC CAA GTG TTT TAT G      | 60°C         | 310 bp        |
| KIT E 9-R  | GAG CCT AAA CAT CCC CTT AAA TTG    |              |               |
| KIT E 11-F | GTG CTC TAA TGA CTG AGA C          | 57°C         | 232 bp        |
| KIT E 11-R | TAC CCA AAA AGG TGA CAT GG         |              |               |
| KIT E 13-F | CAT CAG TTT GCC AGT TGT GC         | 57°C         | 246 bp        |
| KIT E 13-R | AAT CTA GCA TTG CCA AAA TCA        |              |               |
| KIT E 14-F | TGG GAG GCA GAA TTA ATC            | 57°C         | 261 bp        |
| KIT E 14-R | CCC ATG AAC TGC CTG TC             |              |               |
| KIT E 15-F | GAG TGC CCT TCT ACA TGT C          | 57°C         | 243 bp        |
| KIT E 15-R | CAT TGC TAC TGG GAA TGA TG         |              |               |
| KIT E 17-F | AAA AAG TTA GTT TTC ACT CTT TAC AA | 57°C         | 272 bp        |
| KIT E 17-R | TCA CAG GAA ACA ATT TTT ATC GAA    |              |               |
| KIT E 18-F | TGT TCA ATT TTG TTG AGC TTC TG     | 57°C         | 250 bp        |
| KIT E 18-R | AAG GAA GCA GGA CAC CAA TG         |              |               |
| EGFR E 18F | TCC AGC ATG GTG AGG GCT GAG        | 62°C         | 223 bp        |
| EGFR E18R  | GGC TCC CCA CCA GAC CAT G          |              |               |

|                  |                                    |      |        |
|------------------|------------------------------------|------|--------|
| EGFR E 19F       | TGG GCA GCA TGT GGC ACC ATC        | 60°C | 217 bp |
| EGFR E 19R       | AGG TGG GCC TGA GGT TCA G          |      |        |
| EGFR E 20F       | CCT CCT TCT GGC CAC CAT GCG        | 64°C | 296 bp |
| EGFR E 20R       | CAT GTG AGG ATC CTG GCT CC         |      |        |
| EGFR E21F        | CGG ATG CAG AGC TTC TTC CC         | 60°C | 275 bp |
| EGFR E 21R       | AGG CAG CCT GGT CCC TGG TG         |      |        |
| HER E19          | GGT GAA GGA TGT TTG GAG GA         | 60°C | 278 bp |
| HER E19          | CCC CAA TGA AGA GAG ACC AG         |      |        |
| HER2-20-F        | GTT TGG GGG TGT GTG GTC T          | 60°C | 289 bp |
| HER2-20-R        | GTG GAC ATA GGG GTT TGC TC         |      |        |
| HER2 E 21 F      | AGA AGG TCT ACA TGG GTG CTT C      | 60°C | 258 bp |
| HER2 E 21 R      | CAC TCA GAG TTC TCC CAT GGG        |      |        |
| K-RAS-12,13-F    | GGT GAG TTT GTA TTA AAA GGT ACT GG | 60°C | 265 bp |
| K-RAS-12,13-R    | GGT CCT GCA CCA GTA ATA TGC        |      |        |
| BRAF HRM FP3     | ATG CTT GCT CTG ATA GGA AAATGA     | 60°C | 163 bp |
| BRAF HRM RP3     | ATC CAG ACA ACT GTT CAA ACT        |      |        |
| PIK3CA 9 For     | TGA CAA AGA ACA GCT CAA AGC AA     | 60°C | 100 bp |
| PIK3CA 9 Rev     | TTT TAG CAC TTA CCT GTG ACT CCA    |      |        |
| PIK3CA 20 FP3    | GCA AGA GGC TTT GGA GTA TTT CA     | 60°C | 100 bp |
| PIK3CA 20 RP3    | ATG CTG TTT AAT TGT GTG GAA GAT C  |      |        |
| PDGFRA-10-F      | CAC TCA TTG CCA TGA CTC TC         | 60°C | 295 bp |
| PDGFRA-10-R      | TGC GGC TCA GCT GAT GAG            |      |        |
| PDGFRA-12-F      | GTG AAG CTC TGG TGC ACT G          | 57°C | 251 bp |
| PDGFRA-12-R      | GTA AAG TTG TGT GCA AGG G          |      |        |
| PDGFRA-14-F      | TGA GAA CAG GAA GTT GGT AGC TC     | 60°C | 260 bp |
| PDGFRA-14-R      | GGG ATG GAG AGT GGA GGA TT         |      |        |
| PDGFRA-18-F      | CAG CTA CAG ATG GCT TGA TC         | 60°C | 216 bp |
| PDGFRA-18-R      | GAA GGA GGA TGA GCC TGA C          |      |        |
| PDGFRA18 HRM For | GCA CAA GGA AAA ATT GTG AAG AT     | 60°C | 102 bp |
| PDGFRA18 RM Rev2 | AGG GAA GTG AGG ACG TAC ACT G      |      |        |

**Supplemental Table 2:**

**List of samples under investigation with indication of tumor portion, DNA concentration, and allele frequencies of clinical variants as determined on the GeneReader, the Miseq platform or by Sanger sequencing.**

| Sample no. | Diagnosis | Tumor Portion | DNA <sup>#</sup> (ng/μl) | Gene   | AA change          | Variant allele fraction (%) |       |        |
|------------|-----------|---------------|--------------------------|--------|--------------------|-----------------------------|-------|--------|
|            |           |               |                          |        |                    | GeneReader                  | MiSeq | Sanger |
| Q 01       | CRC       | 60%           | 5,8                      | KRAS   | p.G12S             | 89.0                        | 86.6  |        |
| Q 02       | CRC       | 90%           | 13,6                     | KRAS   | p.Q61K             | 22.8                        | 31.8  |        |
| Q 03       | CRC       | 70%           | 4,9                      | KRAS   | p.G12V             | 59.5                        | 59.8  |        |
|            |           |               |                          | PIK3CA | p.E545G            | 51.8                        | 47.0  |        |
| Q 04       | CRC       | 90%           | 0,9                      | KRAS   | p.G12D             | 35.1                        | 35.7  |        |
|            |           |               |                          | PIK3CA | p.Q546K            | 17.3                        | 16.4  |        |
| Q 05       | CRC       | 80%           | 0,3                      | KRAS   | p.G12V             | 47.6                        | 40.3  |        |
| Q 06       | CRC       | 40%           | 12,8                     | KRAS   | p.G12D             | 5.3                         | 6.4   |        |
|            |           |               |                          | NRAS   | p.G12C             | 54.8                        | 59.3  |        |
| Q 07       | CRC       | 90%           | 20,5                     | NRAS   | p.Q61K             | 29.2                        | 32.5  |        |
| Q 08       | CRC       | 80%           | 20,5                     | NRAS   | p.G12D             | 25.1                        | 29.3  |        |
| Q 09       | CRC       | 60%           | 10,7                     | NRAS   | p.Q61L             | 50.8                        | 51.2  |        |
| Q 10       | CRC       | 40%           | 21,2                     | NRAS   | p.Q61K             | 28.9                        | 33.7  |        |
| Q 11       | CRC       | 50%           | 7,0                      | PIK3CA | p.E542K            | 2.8                         | 2.8   |        |
| Q 12       | CRC       | 30%           | 1,9                      | PIK3CA | p.Y985N            | 16.7                        | 12.5  |        |
| Q 13       | CRC       | 80%           | 23,9                     | BRAF   | p.V600E            | 52.5                        | 54.1  |        |
| Q 14       | CRC       | 80%           | 9,5                      | BRAF   | p.V600E            | 25.2                        | 31.6  |        |
| Q 15       | CRC       | 50%           | 5,7                      | BRAF   | p.V600E            | 7.9                         | 9.5   |        |
| Q16        | NSCLC     | 30%           | 3,0                      | ALK    | p.S1136F           | NOT in ROI                  | 15.4  |        |
| Q17        | NSCLC     | 20%           | 3,8                      | WT     |                    |                             |       |        |
| Q18        | NSCLC     | 30%           | 13,8                     | ALK    | p.P1139fs*11       | Not in ROI                  | 9.3   |        |
| Q 19       | NSCLC     | 30%           | 3,2                      | ALK    | p.F1271L           | 8.1                         | 8.5   |        |
|            |           |               |                          | KRAS   | p.G12V             | 38.0                        | 38.8  |        |
| Q 20       | NSCLC     | 70%           | 3,6                      | PIK3CA | p.E545             | 29.2                        | 17.5  |        |
| Q 21       | NSCLC     | 30%           | 12,9                     | EGFR   | p.L747-T751delinsP | 61.6                        | 50.4  |        |
| Q 22       | NSCLC     | 60%           | 11,8                     | EGFR   | p.L858R            | 31.0                        | 26.4  |        |
| Q 23       | NSCLC     | 20%           | 0,5                      | EGFR   | p.E746-S752delinsV | 6.5                         | 8.1   |        |
| Q 24       | NSCLC     | 20%           | 5,3                      | EGFR   | p.D770delinsGY     | 17.5                        | 17.1  |        |

<sup>#</sup>: The concentration of samples' DNA was determined by qPCR.

Supplemental Table 2 Continuation:

| Sample no. | Diagnosis | Tumor Portion | DNA# (ng/μl) | Gene   | AA change                           | Variant allele fraction (%) |       |        |
|------------|-----------|---------------|--------------|--------|-------------------------------------|-----------------------------|-------|--------|
|            |           |               |              |        |                                     | GeneReader                  | MiSeq | Sanger |
| Q 25       | NSCLC     | 30%           | 3,8          | ERBB2  | p.A775-G776insYVMA*                 | 22.3                        | 19.6  |        |
| Q 26       | NSCLC     | 20%           | 4,8          | ERBB2  | p.G776delinsVC                      | 87.7                        | 89.0  |        |
| Q 27       | NSCLC     | 60%           | 17,4         | ERBB2  | p.P780-Y781<br>insGSP               | 44.4                        | 40.8  |        |
| Q 28       | NSCLC     | 30%           | 0,9          | ERBB2  | p.G776delinsVC                      | 36.9                        | 40.5  |        |
| Q 29       | NSCLC     | 30%           | 5,1          | ERBB2  | p.A775-G776insYVMA*                 | 12.7                        | 12.8  |        |
| Q 30       | NSCLC     | 25%           | 2,4          | ERBB2  | p.A775-G776insYVMA*                 | 43.3                        | 37.0  |        |
| Q 31       | Melanoma  | 70%           | 3,3          | BRAF   | p.V600E/p.V207E                     | 31.2                        | 36.6  |        |
| Q 32       | Melanoma  | 40%           | 9,7          | BRAF   | p.V600E/p.V207E                     | 37.6                        | 33.1  |        |
| Q 33*      | Melanoma  | 40%           | 1,3          | PIK3CA | p.E542K                             | 49.4                        | 54.3  |        |
| Q 34       | Melanoma  | 50%           | 12,9         | BRAF   | p.V600E/p.V207E                     | 54.3                        | 62.3  |        |
| Q 35       | Melanoma  | 50%           | 8,5          | BRAF   | p.V600E/p.V207E                     | 34.8                        | 31.8  |        |
|            |           |               |              | ERBB2  | p.V842I                             | 31.0                        | 29.4  |        |
| Q 36       | Melanoma  | 90%           | 20,1         | BRAF   | p.V600E/p.V207E                     | 71.9                        | 68.1  |        |
| Q 37       | Melanoma  | 30%           | 3,4          | BRAF   | p.V600E/p.V207E                     | 21.8                        | 19.2  |        |
| Q 38       | Melanoma  | 50%           | 11,0         | BRAF   | p.V600E/p.V207E                     | 33.5                        | 31.0  |        |
| Q 39       | GIST      | 100%          | 146,00       | PDGFRA | p.D842V                             | 37.2                        |       | 20-50  |
| Q 40       | GIST      | 90%           | 8,2          | KIT    | p.V560E                             | 43.3                        |       | 20-50  |
| Q 41       | GIST      | 60%           | 6,3          | KIT    | p.W557-K558del                      | 8.6                         |       | 20-50  |
| Q 42       | GIST      | 80%           | 16,3         | KIT    | p.A502-Y503dup/<br>p.Y503-F504insAY | 40.8                        |       | 20-50  |
| Q 43       | GIST      | 90%           | 22,8         | KIT    | p.A502-Y503dup/<br>p.Y503-F504insAY | 39.7                        |       | 20-50  |
| Q 44       | GIST      | 90%           | 14,6         | KIT    | p.K642E                             | 48.8                        |       | 20-50  |
| Q 45       | GIST      | 100%          | 19,5         | KIT    | p.N822K                             | 38.1                        |       | 20-50  |
| Q 46       | GIST      | 70%           | 7,7          | KIT    | p.K642E                             | 61.4                        |       | 20-50  |
|            |           |               |              | KIT    | p.D816E                             | 30.6                        |       | 20-50  |
| Q 47       | GIST      | 90%           | 21,9         | PDGFRA | p.D842V                             | 35.7                        | 32.2  |        |
| Q 48       | Stomach   | 70%           | 1,35         | PIK3CA | p.E545K                             | 37.1                        | 42.8  |        |
| Q 49       | Stomach   | 60%           | 11           | KRAS   | p.G12D                              | 41.1                        | 44.4  |        |
|            |           |               |              | PIK3CA | p.E542K                             | 15.1                        | 11.6  |        |
| Q 50       | NSCLC     | 60%           | 3,01         | PIK3CA | p.H1047R                            | 36.0                        | 36.9  |        |

\* alternative nomenclature of the ERBB2 p.A775-G776insYVMA mutant: p.A745-G746insYVMA or p.Y772-A775dup

#: The concentration of samples' DNA was determined by qPCR.
